# Supplementary material for: Optimal soak times for Baited Remote Underwater Video Station surveys of reef-associated elasmobranchs
Source: PubMed Central journal article supplement (PMC7209308; doi:10.1371/journal.pone.0231688), 2020-05-08
Supplement: pone.0231688.s001.pdf [file pone.0231688.s001.pdf]

**S1 Table. Summary of time to first sighting (*TFS*) and time to *MaxN* ( $t_{MaxN}$ ) datasets by country in descending order of countries with  $t_{MaxN}$  data. Percentage of BRUVS where elasmobranchs were recorded is shown.**

| <b>Country</b>                 | <b>Total number of BRUVS</b> | <b>Samples with <i>TFS</i> data</b> | <b>Samples with <math>t_{MaxN}</math> data</b> | <b>BRUVS with elasmobranchs</b> |
|--------------------------------|------------------------------|-------------------------------------|------------------------------------------------|---------------------------------|
| French Polynesia               | 1201                         | -                                   | 962                                            | 80.1%                           |
| Australia                      | 676                          | 556                                 | 556                                            | 82.2%                           |
| Indonesia                      | 806                          | 404                                 | 404                                            | 50.1%                           |
| Palau                          | 216                          | 190                                 | 190                                            | 88.0%                           |
| Malaysia                       | 485                          | 185                                 | 185                                            | 38.1%                           |
| Papua New Guinea               | 301                          | 176                                 | 176                                            | 58.5%                           |
| Federated States of Micronesia | 194                          | 172                                 | 172                                            | 88.7%                           |
| USA-Pacific                    | 125                          | 101                                 | 101                                            | 80.8%                           |
| Kiribati                       | 112                          | 84                                  | 84                                             | 75.0%                           |
| Vanuatu                        | 210                          | 79                                  | 79                                             | 37.6%                           |
| Solomon Islands                | 106                          | 80                                  | 80                                             | 75.5%                           |
| Niue                           | 98                           | 71                                  | 71                                             | 72.4%                           |
| New Caledonia                  | 74                           | -                                   | 62                                             | 83.8%                           |
| Fiji                           | 148                          | 53                                  | 53                                             | 35.8%                           |
| American Samoa                 | 108                          | 52                                  | 52                                             | 48.1%                           |
| Samoa                          | 97                           | 42                                  | 42                                             | 43.3%                           |
| Taiwan                         | 186                          | 35                                  | 35                                             | 18.8%                           |
| Japan                          | 106                          | 32                                  | 32                                             | 30.2%                           |
| Tonga                          | 24                           | 22                                  | 22                                             | 91.7%                           |
| New Zealand                    | 17                           | 15                                  | 15                                             | 88.2%                           |
| Cook Islands                   | 62                           | -                                   | 11                                             | 17.7%                           |
| <b>TOTALS</b>                  | <b>5352</b>                  | <b>2349</b>                         | <b>3384</b>                                    | <b>63.2%</b>                    |
